# Supplementary material for: Recombinant TSR1 of ADAMTS5 Suppresses Melanoma Growth in Mice via an Anti-angiogenic Mechanism
Source: MDPI journal article supplement (doi:10.3390/cancers10060192), 2018-06-11
Supplement: s1 [file s1]

# Recombinant TSR1 of ADAMTS5 Suppresses Melanoma Growth in Mice via an Anti-angiogenic Mechanism

Bhuvanasundar Renganathan, Vinoth Durairaj, Dogan Can Kirman, Paa Kow A. Esubonteng, Swee Kim Ang and Ruowen Ge

Supplementary Material

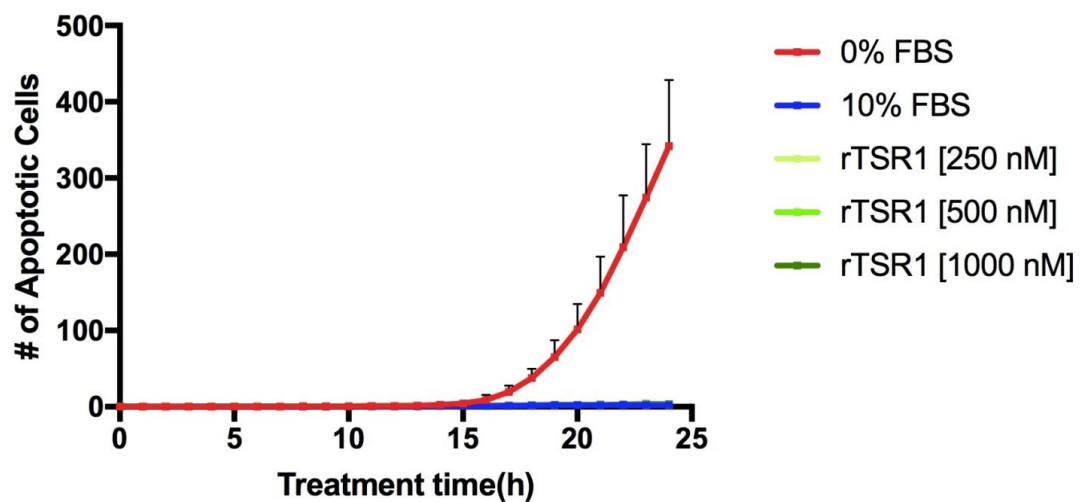

**Figure S1.** rTSR1 did not induce apoptosis in B16 melanoma cells. Various concentrations of rTSR1 (250, 500 and 1000 nM) did not induce apoptosis in B16 melanoma cells. Cells received media with 2% serum served as positive control and cells received media with 10% served as the negative control. Data represents the mean of triplicates  $\pm$  S.D.
